# Supplementary material
Source: PubMed Central journal article supplement (PMC7965444)
Supplement: 2086_table.pdf [file 2086_table.pdf]

**On-line Table 1: Cumulative results after all ratings**

| Variable                            | Diagnostic,<br>No. (%) | Identifiable But<br>Not Diagnostic,<br>No. (%) | Not<br>Identifiable,<br>No. (%) | Total,<br>No. (%) | Wilcoxon, <i>P</i> |
|-------------------------------------|------------------------|------------------------------------------------|---------------------------------|-------------------|--------------------|
| Supratentorial ventricular system   |                        |                                                |                                 |                   |                    |
| ACT                                 | 79 (94.0)              | 5 (6.0)                                        | 0 (0.0)                         | 84 (100)          |                    |
| MDCT                                | 82 (97.6)              | 2 (2.4)                                        | 0 (0.0)                         | 84 (100)          | .26                |
| Infratentorial ventricular system   |                        |                                                |                                 |                   |                    |
| ACT                                 | 51 (60.7)              | 30 (35.7)                                      | 3 (3.6)                         | 84 (100)          | <.05               |
| MDCT                                | 78 (92.9)              | 5 (6.0)                                        | 1 (1.1)                         | 84 (100)          |                    |
| Supratentorial subarachnoidal space |                        |                                                |                                 |                   |                    |
| ACT                                 | 71 (84.5)              | 11 (13.1)                                      | 2 (2.4)                         | 84 (100)          |                    |
| MDCT                                | 77 (91.7)              | 6 (7.1)                                        | 1 (1.2)                         | 84 (100)          | .16                |
| Infratentorial subarachnoidal space |                        |                                                |                                 |                   |                    |
| ACT                                 | 24 (28.6)              | 46 (54.8)                                      | 14 (16.6)                       | 84 (100)          | <.05               |
| MDCT                                | 77 (91.7)              | 4 (4.8)                                        | 3 (3.5)                         | 84 (100)          |                    |
| SAH                                 |                        |                                                |                                 |                   |                    |
| ACT                                 | 37 (90.3)              | 3 (7.3)                                        | 1 (2.4)                         | 41 (100)          |                    |
| MDCT                                | 39 (95.1)              | 2 (4.9)                                        | 0 (0.0)                         | 41 (100)          | .08                |
| IPH                                 |                        |                                                |                                 |                   |                    |
| ACT                                 | 26 (83.9)              | 3 (9.7)                                        | 2 (6.4)                         | 31 (100)          |                    |
| MDCT                                | 29 (93.5)              | 2 (6.5)                                        | 0 (0.0)                         | 31 (100)          | .16                |
| IVH                                 |                        |                                                |                                 |                   |                    |
| ACT                                 | 20 (80.0)              | 4 (16.0)                                       | 1 (4.0)                         | 25 (100)          |                    |
| MDCT                                | 23 (92.0)              | 2 (8.0)                                        | 0 (0.0)                         | 25 (100)          | .11                |
| Basal ganglia                       |                        |                                                |                                 |                   |                    |
| ACT                                 | 15 (17.9)              | 54 (64.3)                                      | 15 (17.8)                       | 84 (100)          | <.05               |
| MDCT                                | 78 (92.9)              | 4 (4.8)                                        | 2 (2.3)                         | 84 (100)          |                    |
| Insular cortex                      |                        |                                                |                                 |                   |                    |
| ACT                                 | 5 (6.0)                | 42 (50.0)                                      | 37 (44.0)                       | 84 (100)          | <.05               |
| MDCT                                | 72 (85.7)              | 11 (13.1)                                      | 1 (1.2)                         | 84 (100)          |                    |
| Central cortex                      |                        |                                                |                                 |                   |                    |
| ACT                                 | 15 (17.9)              | 58 (69.0)                                      | 11 (13.1)                       | 84 (100)          | <.05               |
| MDCT                                | 81 (96.4)              | 2 (2.4)                                        | 1 (1.2)                         | 84 (100)          |                    |
| EVD                                 |                        |                                                |                                 |                   |                    |
| ACT                                 | 34 (97.1)              | 1 (2.9)                                        | 0 (0.0)                         | 35 (100)          |                    |
| MDCT                                | 33 (94.3)              | 2 (5.7)                                        | 0 (0.0)                         | 35 (100)          | .56                |
